# Supplementary material for: Tea waste-supported hydrated manganese dioxide (HMO) for enhanced removal of typical toxic metal ions from water
Source: Royal Society of Chemistry journal article supplement (doi:10.1039/c5ra16556c), 2015-01-01

Fig. S1 Scanning electron microscope of the original tea waste and the as-prepared HMO-TW

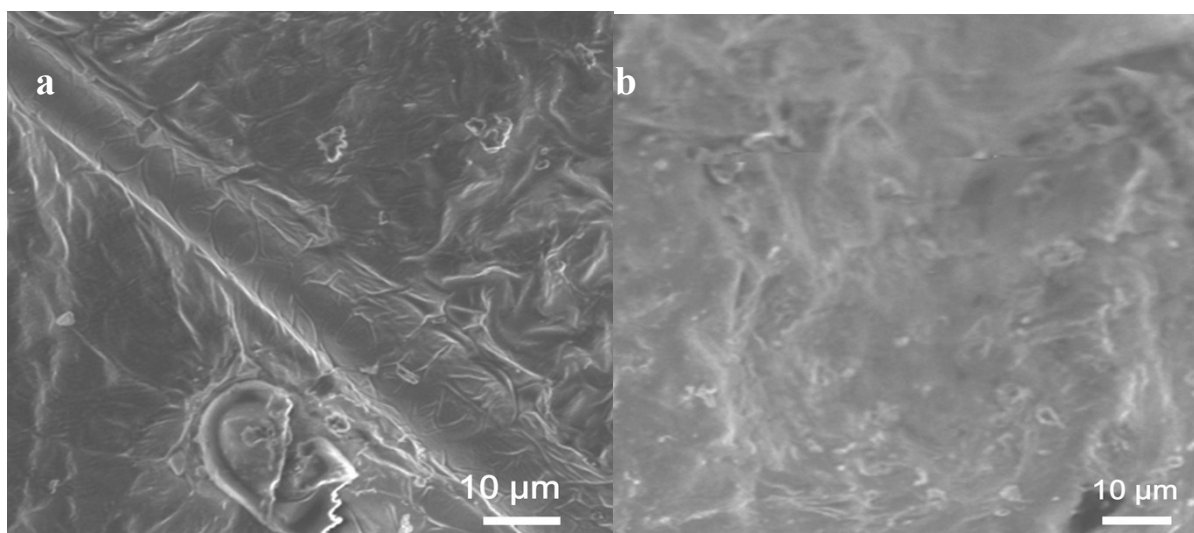

Fig. S2 XRD pattern of the prepared HMO-TW in current research

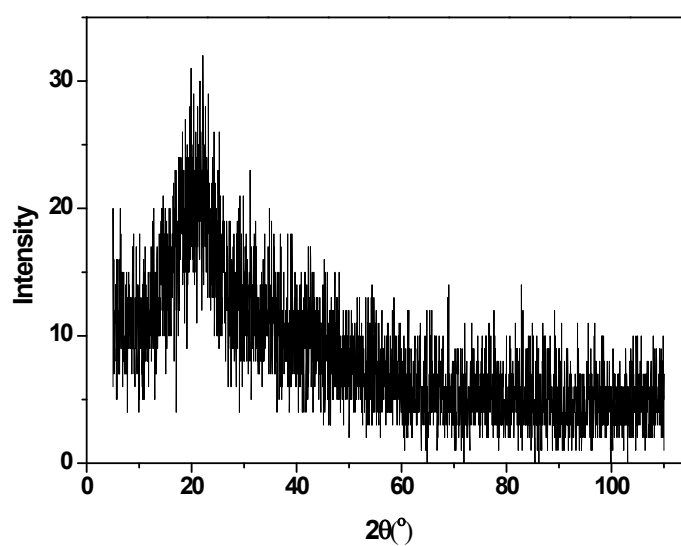

Fig.S3 Schematic illustration of Donnan effect caused by functional groups of host tea waste

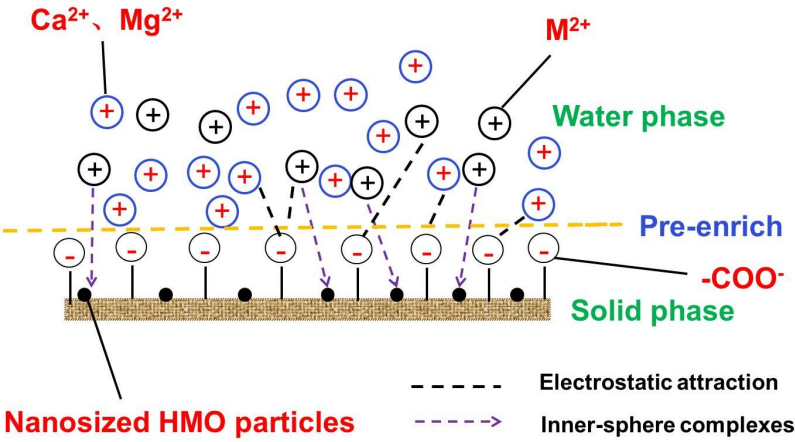

**Donnan effect**

Fig. S4 Effect of initial metals concentration on heavy metals removal by HMO-TW (Black lines refers to sorption capacities trend and red lines refers to removal trend). Conditions: Sorbent dose = 0.4 g L<sup>-1</sup>; pH = 5.5±0.2; Temperature = 298 K.

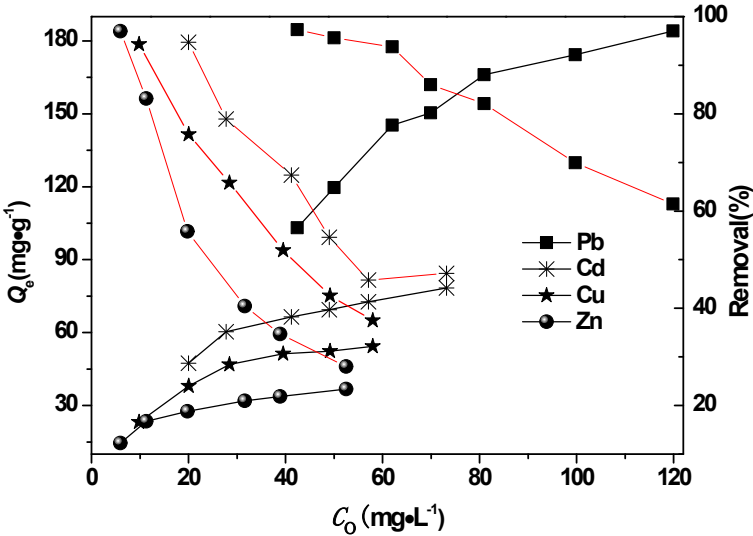

Supplement: c5ra16556c1.pdf [file c5ra16556c1.pdf]
